# Supplementary material for: The relationship between multiple chronic diseases and depressive symptoms among middle-aged and elderly populations: results of a 2009 korean community health survey of 156,747 participants
Source: Springer Nature journal article supplement (doi:10.1186/s12889-017-4798-2), 2017-10-25
Supplement: MOESM2 [file 15164122]

Additional file: Figure 1. Risk ratios of depressive symptoms by the number of diseases stratified by age and gender

| No. of diseases | 40-59 yr<br>(No. participants=88,749) |                     |                                  |                     | ≥60 yr<br>(No. participants=67,998) |                     |                                  |                     |
|-----------------|---------------------------------------|---------------------|----------------------------------|---------------------|-------------------------------------|---------------------|----------------------------------|---------------------|
|                 | Men                                   |                     | Women                            |                     | Men                                 |                     | Women                            |                     |
|                 | Adjusted risk ratio <sup>a</sup>      | 95% CL <sup>b</sup> | Adjusted risk ratio <sup>a</sup> | 95% CL <sup>b</sup> | Adjusted risk ratio <sup>a</sup>    | 95% CL <sup>b</sup> | Adjusted risk ratio <sup>a</sup> | 95% CL <sup>b</sup> |
| 0               |                                       |                     |                                  |                     |                                     |                     |                                  |                     |
| 1               | 1.432                                 | 1.31-1.57           | 1.430                            | 1.33-1.54           | 1.212                               | 1.10-1.34           | 1.221                            | 1.21-1.33           |
| 2               | 1.898                                 | 1.67-2.16           | 1.885                            | 1.71-2.08           | 1.502                               | 1.35-1.68           | 1.447                            | 1.33-1.58           |
| 3               | 2.918                                 | 2.42-3.52           | 2.459                            | 2.13-2.84           | 1.769                               | 1.55-2.02           | 1.971                            | 1.81-2.15           |
| 4 or more       | 3.57                                  | 2.66-4.80           | 4.985                            | 4.13-6.03           | 2.857                               | 2.45-3.33           | 2.617                            | 2.39-2.87           |

<sup>a</sup> Multivariate logistic regression model adjusted for age (continuous variable), gender, marital status, employment, occupational categories, education, income and residence location.

<sup>b</sup> 95% CL; 95% confidence limits

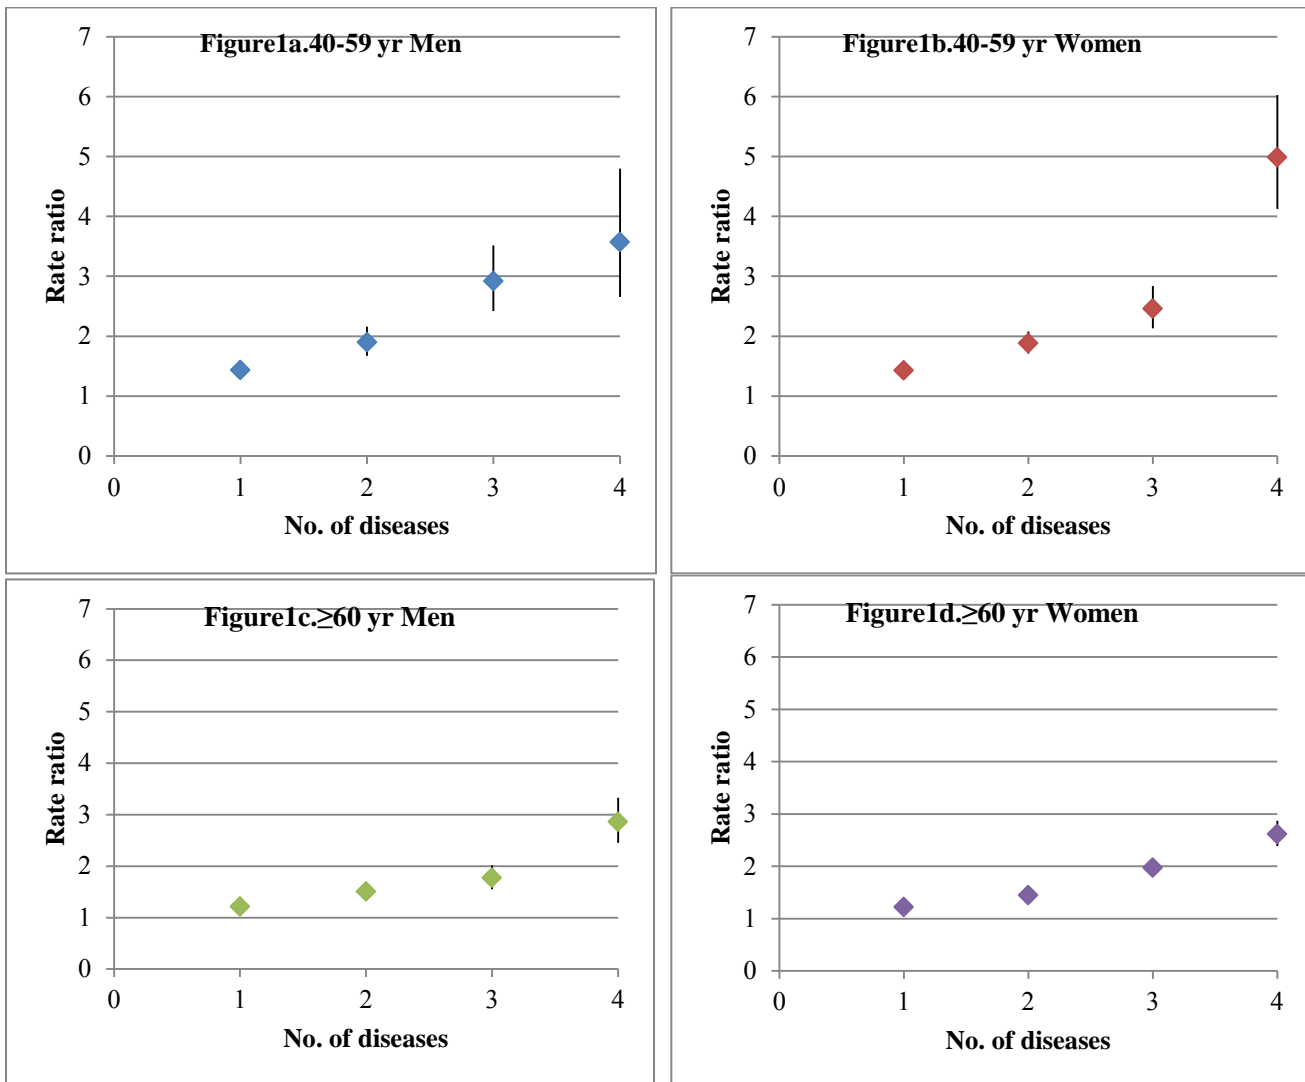

**Figure legends**

Supplementary figure1 a. Rate ratios of experiencing depressive symptoms by the number of diseases in men aged 40-59 yr.

Supplementary figure1 b. Rate ratios of experiencing depressive symptoms by the number of diseases in women aged 40-59 yr.

Supplementary figure1 c. Rate ratios of experiencing depressive symptoms by the number of diseases in men aged  $\geq 60$  yr.

Supplementary figure1 d. Rate ratios of experiencing depressive symptoms by the number of diseases in women aged  $\geq 60$  yr
